# Supplementary material for: Vanadium-doped Li 2 TiSiO 5 anodes for boosting capacity and cycling stability of lithium-ion batteries
Source: Royal Society of Chemistry journal article supplement (doi:10.1039/d4ta08073d), 2025-01-01
Supplement: d4ta08073d1.pdf [file d4ta08073d1.pdf]

## Supporting Information

### **Vanadium-doped $\text{Li}_2\text{TiSiO}_5$ anode for boosting specific capacity and cycling stability of lithium-ion batteries**

*Yuting Cai, Hao Huang, Zhongcheng Song\*, Xinxin Dong, Mengyuan Tong, Qihu Wu, Chao Yu, Lixia Sun\*, Ziqi Sun, Ting Liao, Pingan Song\**

Y. T. Cai, H Huang, Z. C. Song, M. Y. Tong, Q. H. Wu, C. Yu, L. X. Sun

*School of Chemistry and Chemical Engineering*

*Jiangsu University of Technology*

*Changzhou 213001, China*

Email: [songzhongcheng@jsut.edu.cn](mailto:songzhongcheng@jsut.edu.cn) (Z. Song), [sunlixia@jsut.edu.cn](mailto:sunlixia@jsut.edu.cn) (L. Sun)

X. X. Dong

*State Key Laboratory of Organic-Inorganic Composites*

*Center for Fire Safety Materials, Beijing University of Chemical Technology*

*Beijing, 100029, China.*

Prof Z. Q. Sun

*Centre for Materials Science, School of Chemistry and Physics, Queensland University of Technology, Brisbane, QLD 4000 Australia*

T. Liao

*School of Mechanical Medical and Process Engineering,*

*Queensland University of Technology, George Street, Brisbane,*

*QLD 4000, Australia*

Prof P. A. Song

*Centre for Future Materials, School of Agriculture and Environmental Science*

*University of Southern Queensland*

*Springfield 4300, QLD, Australia*

Email: [pingan.song@usq.edu.au](mailto:pingan.song@usq.edu.au) (P. Song)

## Table of Contents

### Figure S1

#### Table S1

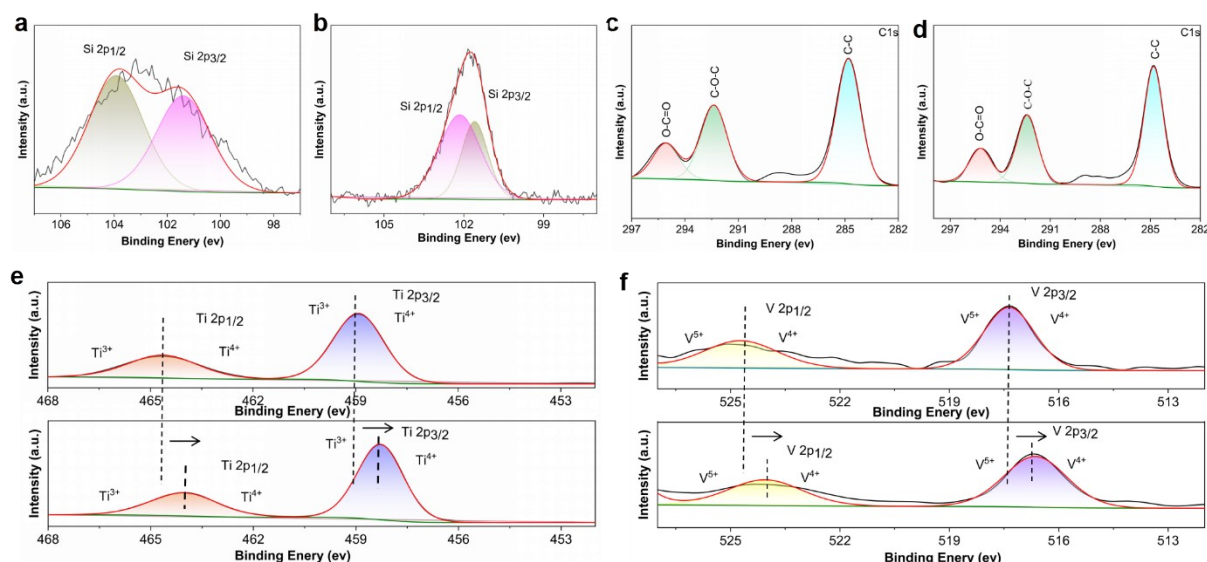

**Figure S1** a) High-resolution Si 2p of  $\text{Li}_2\text{TiSiO}_5$ . b) High-resolution Si 2p of  $\text{Li}_2\text{Ti}_{0.95}\text{V}_{0.05}\text{SiO}_5$ . c) High-resolution in-situ XPS of C1s in  $\text{Li}_2\text{Ti}_{0.95}\text{V}_{0.05}\text{SiO}_5$  in the dark. d) High-resolution in-situ XPS of C1s under  $\text{Li}_2\text{Ti}_{0.95}\text{V}_{0.05}\text{SiO}_5$  illumination. e) High-resolution Ti 2p of  $\text{Li}_2\text{Ti}_{0.95}\text{V}_{0.05}\text{SiO}_5$  high-resolution Ti 2p in situ XPS. f) High-resolution V 2p in situ XPS of  $\text{Li}_2\text{Ti}_{0.95}\text{V}_{0.05}\text{SiO}_5$ .

**Table S1** Refined lattice parameters of  $\text{Li}_2\text{Ti}_{1-x}\text{V}_x\text{SiO}_5$  ( $x = 0, 0.025, 0.05$  and  $0.075$ ) samples; along with R-factors

| sample                                                     | Space group | $a$<br>(Å) | $b$<br>(Å) | $c$<br>(Å) | $V$<br>(Å) <sup>3</sup> | $R_p$ | $wR_p$ | $\chi^2$ |
|------------------------------------------------------------|-------------|------------|------------|------------|-------------------------|-------|--------|----------|
| $\text{Li}_2\text{Ti}_1\text{SiO}_5$                       | P 4/n m m   | 6.443540   | 6.443540   | 4.42120    | 183.1012                | 9.01% | 6.89%  | 1.76     |
| $\text{Li}_2\text{Ti}_{0.975}\text{V}_{0.025}\text{SiO}_5$ | P 4/n m m   | 6.44510    | 6.44510    | 4.40530    | 182.9931                | 5.63% | 7.53%  | 1.75     |
| $\text{Li}_2\text{Ti}_{0.95}\text{V}_{0.05}\text{SiO}_5$   | P 4/n m m   | 6.44340    | 6.44340    | 4.40579    | 182.9703                | 6.28% | 8.44%  | 1.71     |
| $\text{Li}_2\text{Ti}_{0.925}\text{V}_{0.075}\text{SiO}_5$ | P 4/n m m   | 6.44680    | 6.44680    | 4.41020    | 183.2934                | 6.02% | 8.07%  | 1.91     |

Note: All samples have the same cell angle. ( $\alpha = 90^\circ, \beta = 90^\circ, \gamma = 90^\circ$ )

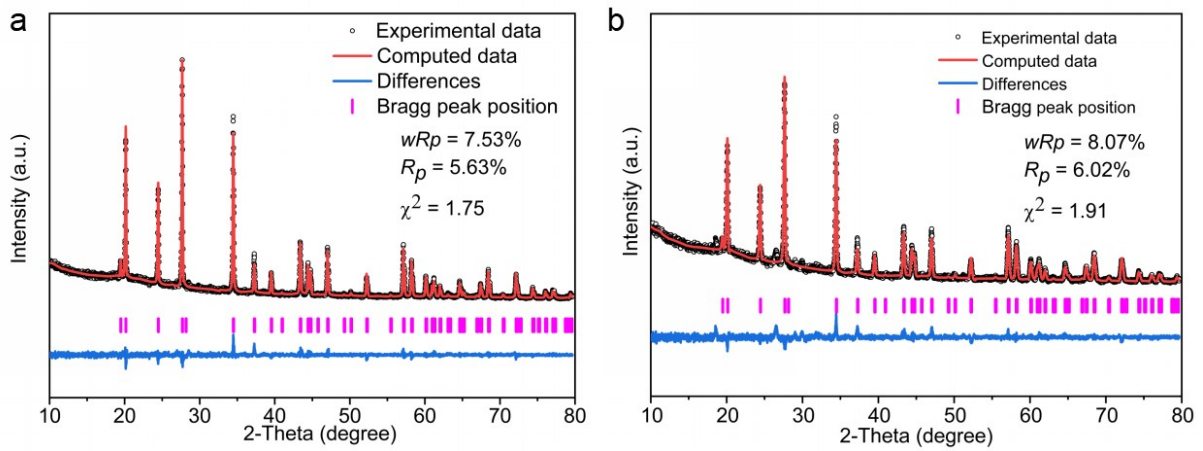

**Figure S2** a) Refined graphs of  $\text{Li}_2\text{Ti}_{0.975}\text{V}_{0.025}\text{SiO}_5$ . b) Reined graphs of  $\text{Li}_2\text{Ti}_{0.925}\text{V}_{0.075}\text{SiO}_5$ .

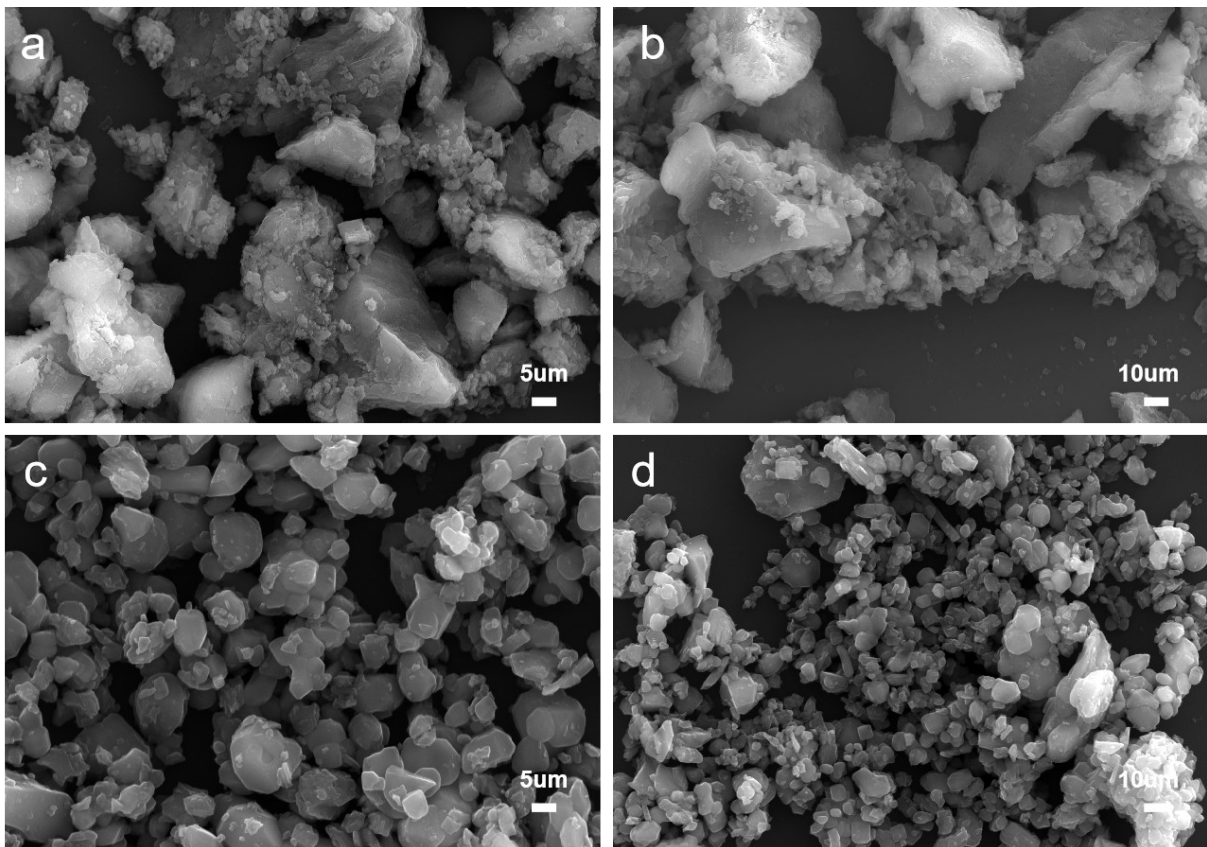

**Figure S3** SEM images of (a and b) LTSO and (c and d)  $\text{Li}_2\text{Ti}_{0.95}\text{V}_{0.05}\text{SiO}_5$  at different magnifications.
